# Supplementary material for: Studying suicide using proxy-based data: reliability and validity of a short version scale for measuring quality of life in rural China
Source: PeerJ. 2021 Nov 9;9:e12396. doi: 10.7717/peerj.12396 (PMC8588864; doi:10.7717/peerj.12396)
Supplement: Supplemental Information 1 — The data of each scale related to the analysis of this article and the data of each item of the quality of life scale. [file peerj-09-12396-s001.xlsx]

## Sheet: Sheet1
Area number	Number of pairs	Questionnaire number	Target category	status	Sex of target	Age	Education	Marital status	Employment	Suffering from serious or chronic	Physical pain	Family annual income (RMB)	Living alone	Being left behind	Geriatric Depression Scale	University of California Los Angeles Loneliness Scale,ULS-6	Beck's Hopelessness Scale	Barratt Impulsiveness Scale	Duke Social Support Index	Activity of Daily Living Scale, ADL	family Adaptive, Partnership, Growth, Affection and Resolve Scale (APGAR)	Number of life events	QOL1	QOL2	QOL3	QOL4	QOL5	QOL6	Total score of QOL
1:Hunan, 2: Guangxi, 3:Shandong			1:Suicide group, 2: Living control group	0: survival, 1: Death	0: Female, 2: Male		1:Below primary school, 2: primary school, 3: junior high school, 4: high school and above	1: stable marital status, 2: unstable marital status	1: Employed, 2: Unemployed, 3: Retired	0: No, 1: Yes	0: Yes, 1: No	1: <3600, 2: 3600-10000, 3: >10000	0: No, 1: Yes	0:No, 1: Yes
1	2	213	1	1	1	84	2	2	1	1	1	1	0	0	24	12	13	87	32	14	10	10	1	1	1	1	4	4	12
1	4	413	1	1	0	60	2	1	2	0	1	2	0	0	16	10	12	99	11	56	0	3	4	4	3	4	5	4	24
1	5	513	1	1	1	84	2	2	2	1	1	2	0	0	12	19	9	87	26	33	6	4	2	2	2	2	3	4	15
1	6	613	1	1	1	78	2	2	2	0	1	2	1	0	26	18	12	108	12	54	0	8	4	4	3	3	2	2	18
1	7	713	1	1	0	83	1	2	2	1	1	3	0	0	25	12	14	94	25	50	5	4	1	1	3	2	2	2	11
1	8	813	1	1	1	85	1	2	2	1	1	3	0	0	22	6	12	118	12	40	0	7	2	1	3	3	4	2	15
1	9	913	1	1	0	76	1	1	2	1	1	2	1	0	8	13	10	76	26	54	6	1	3	3	3	3	4	4	20
1	10	1013	1	1	0	82	1	2	2	1	1	2	0	0	27	21	15	98	13	14	0	3	2	2	2	2	3	3	14
1	11	1113	1	1	0	80	1	2	2	0	1	1	1	0	25	22	12	74	15	53	1	5	2	2	3	3	3	3	16
1	12	1213	1	1	1	81	3	1	3	1	1	2	0	0	13	11	7	60	23	56	0	10	2	3	3	3	4	4	19
1	14	1413	1	1	0	82	1	2	2	0	1	3	0	0	25	21	13	100	20	49	0	7	1	3	1	3	1	4	13
1	15	1513	1	1	0	82	1	2	2	1	1	2	1	0	26	11	12	100	28	52	7	7	1	3	3	3	4	4	18
1	16	1613	1	1	1	78	2	1	2	1	1	3	0	0	25	12	12	70	34	40	10	4	1	2	3	1	5	4	16
1	18	1813	1	1	1	75	2	2	2	1	1	3	0	0	22	10	18	119	23	52	7	3	1	2	2	2	3	4	14
1	19	1913	1	1	1	62	2	1	1	1	1	3	0	0	17	6	17	68	31	56	10	5	1	1	2	1	4	4	13
1	20	2013	1	1	0	83	1	2	2	1	1	2	0	0	14	10	16	96	22	51	0	5	1	3	3	3	4	4	18
1	21	2113	1	1	1	81	2	2	2	1	1	3	1	0	21	24	14	117	11	56	1	8	3	3	4	3	3	3	19
1	22	2213	1	1	1	68	2	1	2	1	0	1	0	0	28	18	16	138	22	52	6	7	2	2	2	2	2	3	13
1	24	2413	1	1	0	83	1	1	2	1	1	2	0	0	29	18	18	85	26	20	3	9	1	1	2	1	4	4	13
1	25	2513	1	1	1	69	3	1	2	0	1	1	0	0	4	10	12	92	30	56	9	4	3	3	3	3	3	3	18
1	26	2613	1	1	0	84	3	2	2	1	1	2	0	0	17	14	11	88	24	19	5	8	2	3	2	2	4	4	17
1	28	2813	1	1	1	68	2	1	2	1	1	2	0	0	27	19	16	96	17	53	0	8	3	3	1	2	2	3	14
1	29	2913	1	1	0	79	1	2	2	1	1	2	0	0	16	14	20	119	26	14	2	8	1	3	2	1	4	3	14
1	30	3013	1	1	1	60	2	1	2	1	1	2	0	0	23	16	18	112	25	22	6	9	1	1	1	1	4	4	12
1	31	3113	1	1	1	78	2	2	2	1	1	3	0	0	18	14	12	100	24	40	4	8	3	2	3	2	4	4	18
1	32	3213	1	1	0	73	2	2	2	1	1	3	1	0	24	18	15	90	23	52	0	6	2	2	2	2	3	3	14
1	33	3313	1	1	0	67	2	2	2	1	1	2	0	0	15	12	10	88	23	56	5	4	2	3	3	2	4	4	18
1	34	3413	1	1	1	75	2	1	2	1	1	2	0	0	18	6	14	89	14	14	6	5	1	2	3	2	4	4	16
1	35	3513	1	1	0	68	2	2	2	1	1	2	0	0	25	15	14	86	27	42	0	7	2	2	3	2	3	3	15
1	36	3613	1	1	1	79	3	1	2	1	1	1	0	0	26	11	16	116	25	52	0	3	2	2	1	2	3	3	13
1	38	3813	1	1	1	80	2	2	1	0	1	2	0	0	27	24	14	121	18	53	0	5	2	2	2	2	3	3	14
1	39	3913	1	1	0	84	1	1	2	1	1	1	0	0	23	24	13	122	15	34	0	10	2	2	2	2	4	3	15
1	40	4013	1	1	1	91	2	1	2	1	1	2	0	0	22	6	16	133	23	53	0	6	2	3	3	2	2	3	15
1	42	4213	1	1	1	77	2	2	2	0	1	1	1	0	22	24	17	130	26	56	7	3	2	2	3	3	3	2	15
1	43	4313	1	1	1	86	2	2	2	1	1	2	0	0	16	12	15	94	24	44	5	6	2	2	2	2	4	4	16
1	44	4413	1	1	0	82	1	2	2	1	1	3	0	0	22	12	12	117	22	46	5	7	2	3	3	2	3	3	16
1	46	4613	1	1	0	80	1	2	2	0	1	2	0	0	5	7	12	83	33	56	10	6	2	3	3	3	4	4	19
1	47	4713	1	1	1	75	2	2	2	1	0	3	0	0	23	10	14	100	23	54	3	8	2	2	3	2	2	3	14
1	48	4813	1	1	1	70	2	1	2	1	1	2	0	0	18	6	14	71	26	56	8	5	1	3	3	2	4	3	16
1	50	5013	1	1	1	84	2	2	3	0	1	2	1	0	24	22	14	131	23	51	2	8	2	2	4	2	1	2	13
1	52	5213	1	1	0	74	1	1	2	1	1	1	0	0	29	22	18	108	12	32	0	12	2	2	1	2	1	4	12
1	54	5413	1	1	0	73	1	2	2	1	0	3	0	0	25	10	14	123	21	51	10	7	3	2	3	1	4	4	17
1	55	5513	1	1	1	72	2	1	2	1	1	1	0	0	28	18	17	105	25	37	6	5	1	2	1	1	3	3	11
1	56	5613	1	1	0	83	2	1	2	1	1	1	0	0	28	18	15	90	26	50	4	11	2	2	2	2	3	3	14
1	58	5813	1	1	1	85	2	2	2	0	1	1	0	0	27	19	15	106	21	31	2	9	1	2	1	1	2	3	10
1	60	6013	1	1	0	60	3	1	2	1	1	1	0	0	29	12	15	101	29	53	5	6	1	1	1	2	4	3	12
1	61	6113	1	1	0	72	2	2	2	0	1	2	0	0	26	14	12	113	13	56	5	5	3	3	2	3	3	4	18
1	63	6313	1	1	0	60	1	1	1	1	1	2	0	0	28	17	18	108	26	27	10	6	2	2	3	2	3	3	15
1	64	6413	1	1	1	82	2	2	2	1	1	1	0	0	21	11	15	97	23	53	5	5	2	2	1	2	3	3	13
1	65	6513	1	1	1	62	1	1	2	1	1	2	0	0	21	15	14	93	13	56	5	5	4	3	4	4	4	3	22
1	66	6613	1	1	1	95	1	2	1	0	1	1	1	0	17	18	15	99	11	50	4	6	3	2	3	3	1	3	15
1	67	6713	1	1	1	67	2	1	1	1	1	2	0	0	17	11	14	101	14	56	5	1	3	3	3	2	4	3	18
1	68	6813	1	1	0	77	2	1	2	1	1	2	0	0	24	15	15	94	12	44	5	5	1	2	2	2	3	3	13
1	70	7013	1	1	1	88	1	2	1	0	1	3	0	0	20	15	15	114	12	53	0	8	3	3	2	3	2	3	16
1	72	7213	1	1	0	65	2	1	1	1	1	3	0	0	21	15	14	100	26	56	5	9	2	2	3	3	3	2	15
1	74	7413	1	1	1	95	2	2	1	1	1	3	0	0	25	18	14	107	24	28	0	12	1	1	2	2	3	2	11
1	75	7513	1	1	1	76	2	2	1	0	1	3	0	0	21	14	15	90	26	56	8	5	3	2	3	3	3	3	17
1	76	7613	1	1	0	79	1	1	2	0	1	3	0	0	24	15	16	101	24	52	7	2	2	2	3	2	4	3	16
1	77	7713	1	1	1	72	2	1	2	1	0	1	0	0	25	20	12	103	11	55	0	6	2	2	1	2	3	3	13
1	78	7813	1	1	0	82	1	2	2	1	1	3	0	0	24	21	15	111	11	48	0	4	3	2	3	3	2	3	16
1	79	7913	1	1	0	78	2	2	2	1	1	3	0	0	21	17	15	82	25	18	5	5	1	1	3	1	4	2	12
2	81	8113	1	1	1	79	1	2	1	1	1	3	1	0	24	13	19	79	28	53	8	7	1	1	4	1	4	4	15
2	82	8213	1	1	0	77	1	1	2	1	0	3	0	0	3	9	10	88	29	54	10	5	3	4	3	3	4	4	21
2	83	8313	1	1	1	82	1	2	1	1	1	2	1	0	29	23	13	101	12	56	0	14	2	2	4	3	2	2	15
2	84	8413	1	1	0	82	1	2	2	1	1	3	0	0	21	13	14	93	27	40	6	7	1	1	3	3	3	3	14
2	86	8613	1	1	0	87	1	2	2	1	0	3	1	0	24	20	16	96	22	50	6	6	2	2	4	3	4	4	19
2	87	8713	1	1	0	83	1	2	3	1	1	2	1	0	21	24	9	104	26	56	7	5	2	3	3	3	3	3	17
2	88	8813	1	1	1	77	2	2	2	1	1	1	1	0	27	24	16	118	11	56	0	10	2	2	2	2	2	2	12
2	89	8913	1	1	0	72	2	2	2	1	1	2	1	0	12	17	14	107	15	56	5	5	4	3	3	3	3	3	19
2	90	9013	1	1	1	75	3	1	1	0	1	2	0	0	19	19	12	77	14	56	0	4	4	3	3	4	4	4	22
2	94	9413	1	1	1	82	1	2	1	1	1	2	0	0	11	19	11	88	20	52	0	8	1	4	3	3	4	2	17
2	95	9513	1	1	0	78	2	2	2	0	1	2	1	0	9	18	9	111	21	53	1	4	4	4	3	3	4	4	22
2	96	9613	1	1	1	82	1	2	2	1	1	1	1	0	28	18	17	117	22	23	4	11	1	1	2	1	3	3	11
2	97	9713	1	1	0	89	1	1	2	0	1	2	0	0	14	11	12	72	18	56	10	1	3	3	3	4	3	3	19
2	98	9813	1	1	1	77	4	2	2	1	1	1	0	0	27	21	17	98	17	45	3	10	1	1	2	1	1	4	10
2	100	10013	1	1	0	60	1	1	2	0	1	3	0	0	9	10	10	108	19	56	7	4	4	4	3	3	3	3	20
2	102	10213	1	1	0	81	1	2	2	1	1	1	0	0	18	12	15	95	20	25	5	7	1	3	4	1	4	4	17
2	103	10313	1	1	0	79	1	2	2	0	1	1	0	0	16	12	16	107	23	53	0	4	4	3	3	3	2	4	19
2	104	10413	1	1	1	69	2	1	2	1	1	1	0	0	20	12	17	97	27	41	10	4	1	1	2	1	4	4	13
2	105	10513	1	1	0	82	2	2	2	0	1	1	0	0	23	20	15	90	25	46	2	6	2	2	2	2	3	3	14
2	106	10613	1	1	1	82	4	1	3	0	1	2	0	0	15	13	14	74	17	56	10	5	2	3	3	2	4	4	18
2	107	10713	1	1	0	74	2	1	1	1	1	1	0	0	7	7	13	82	24	53	10	4	3	4	4	4	4	4	23
2	108	10813	1	1	0	86	1	2	2	1	1	2	1	0	15	9	11	79	22	52	10	6	3	3	4	3	5	5	23
2	109	10913	1	1	0	66	1	1	2	1	1	2	0	0	20	10	13	79	20	56	9	4	3	2	3	2	4	4	18
2	110	11013	1	1	1	73	2	1	1	1	1	2	0	0	20	13	14	85	22	35	7	8	2	2	2	2	3	4	15
2	111	11113	1	1	1	73	1	2	1	1	0	2	1	0	22	15	15	84	20	16	10	6	1	2	3	1	4	4	15
2	112	11213	1	1	0	75	1	1	2	1	1	2	0	0	25	16	17	118	33	56	4	4	1	1	3	2	3	3	13
2	113	11313	1	1	1	73	1	1	2	1	0	2	1	0	27	22	14	130	16	56	1	9	3	3	2	2	2	2	14
2	114	11413	1	1	1	64	2	2	2	1	0	2	0	0	20	19	15	119	21	56	0	5	2	2	3	3	3	3	16
2	115	11513	1	1	1	74	1	2	3	1	1	3	1	0	25	18	14	90	17	48	5	9	1	1	2	1	3	3	11
2	116	11613	1	1	1	81	1	2	1	1	1	1	0	0	22	21	17	96	22	56	2	6	1	1	2	2	4	4	14
2	117	11713	1	1	0	83	1	2	2	1	1	1	1	0	22	19	11	130	18	27	5	5	3	2	2	2	2	3	14
2	118	11813	1	1	0	70	1	2	1	1	0	1	0	0	19	12	14	98	20	26	5	5	2	2	3	2	4	3	16
2	120	12013	1	1	0	83	1	2	2	1	0	3	1	0	17	19	14	124	18	56	0	4	2	3	2	3	2	3	15
2	121	12113	1	1	1	74	2	1	2	1	1	2	0	0	16	18	13	102	18	28	10	2	2	2	3	2	4	3	16
2	122	12213	1	1	0	67	2	2	1	1	0	2	0	0	17	17	14	82	19	56	4	7	2	2	3	3	2	3	15
2	123	12313	1	1	0	60	2	1	1	1	1	1	0	0	22	17	14	92	21	56	5	3	2	2	3	2	4	4	17
2	125	12513	1	1	1	84	2	2	1	1	0	1	1	0	16	20	15	84	14	56	0	4	3	2	2	3	2	3	15
2	126	12613	1	1	0	84	2	2	2	0	1	2	1	0	19	20	13	112	11	56	1	9	4	3	3	3	1	2	16
2	127	12713	1	1	0	71	2	2	2	1	1	2	1	0	17	21	14	82	23	56	3	7	2	2	3	3	3	3	16
2	128	12813	1	1	0	76	2	1	2	1	0	3	0	0	13	12	14	112	27	56	10	4	2	2	3	3	3	3	16
2	129	12913	1	1	1	63	2	1	1	1	0	3	0	0	27	24	18	112	23	56	0	6	1	1	3	2	2	2	11
2	130	13013	1	1	1	74	2	1	2	1	1	1	0	0	28	24	18	111	26	56	0	5	1	1	1	1	3	3	10
2	134	13413	1	1	0	64	1	2	2	1	0	3	0	0	15	19	15	110	15	56	0	5	3	2	3	3	2	4	17
2	135	13513	1	1	0	80	1	2	2	1	1	3	0	0	10	18	15	107	26	56	5	4	4	1	3	2	2	4	16
2	136	13613	1	1	1	78	2	2	2	1	0	3	0	0	20	18	15	103	25	46	5	5	2	2	4	2	3	4	17
2	138	13813	1	1	0	88	1	2	2	1	1	3	0	0	21	18	15	111	25	56	5	6	1	1	3	2	3	3	13
2	139	13913	1	1	0	76	1	2	2	1	1	3	0	0	20	18	15	109	24	56	1	3	2	2	3	3	3	4	17
2	141	14113	1	1	1	78	2	2	2	0	1	2	1	0	18	24	12	144	17	56	0	5	4	3	3	3	1	1	15
2	143	14313	1	1	0	74	1	2	2	1	1	2	1	0	28	23	17	134	22	56	3	9	1	1	3	1	1	2	9
2	144	14413	1	1	1	82	2	1	2	1	0	1	0	0	21	24	18	112	21	49	1	4	1	2	3	3	3	3	15
2	146	14613	1	1	1	69	3	1	2	1	1	2	0	0	23	13	13	73	24	48	6	6	2	2	3	2	4	3	16
2	147	14713	1	1	1	69	2	1	2	1	0	3	0	0	27	24	17	122	25	41	0	5	2	3	2	2	1	4	14
2	148	14813	1	1	1	63	2	1	2	0	1	3	0	0	29	24	17	113	22	49	2	8	2	1	2	2	2	2	11
2	149	14913	1	1	1	93	4	2	2	1	1	1	1	0	24	17	15	76	28	34	8	4	1	2	3	2	4	4	16
2	150	15013	1	1	1	78	3	1	2	1	0	2	0	0	26	24	19	117	18	38	0	11	1	1	4	1	2	2	11
2	152	15213	1	1	0	75	3	2	2	1	0	3	0	0	24	19	14	107	18	56	2	3	3	3	3	3	3	4	19
3	153	15313	1	1	1	69	2	2	2	1	1	1	1	0	14	9	15	85	36	56	8	4	2	3	3	4	4	4	20
3	154	15413	1	1	0	77	1	2	2	0	1	1	1	0	15	14	17	130	25	49	10	5	4	4	3	1	3	3	18
3	155	15513	1	1	1	67	2	1	2	1	1	3	0	0	11	10	9	88	35	32	10	2	1	3	3	1	5	4	17
3	156	15613	1	1	0	87	1	1	2	1	1	1	0	0	23	15	14	110	26	46	4	6	4	2	3	1	3	4	17
3	157	15713	1	1	0	82	1	2	2	1	1	1	0	0	25	18	15	114	22	30	4	7	2	2	3	2	3	3	15
3	158	15813	1	1	1	60	1	1	2	1	1	1	0	0	25	22	17	117	18	30	0	5	1	1	1	1	1	4	9
3	159	15913	1	1	0	72	1	1	2	0	1	2	0	0	21	20	12	115	25	50	5	2	3	2	3	1	3	3	15
3	160	16013	1	1	0	65	2	2	2	1	1	1	1	0	22	23	14	88	16	56	2	5	2	3	3	3	3	3	17
3	161	16113	1	1	1	83	1	1	1	1	1	1	1	0	25	12	13	105	28	36	6	9	1	1	2	1	1	4	10
3	162	16213	1	1	0	70	1	1	2	1	1	3	0	0	26	15	18	106	23	56	1	6	3	1	2	3	4	4	17
3	163	16313	1	1	1	75	2	1	2	1	1	1	0	0	27	16	18	111	26	18	5	5	1	1	2	1	3	3	11
3	165	16513	1	1	0	72	1	2	2	1	1	3	0	0	14	6	18	113	29	52	5	3	1	2	2	2	3	3	13
3	166	16613	1	1	1	83	1	1	2	1	1	2	0	0	23	14	11	90	26	37	9	6	2	2	3	1	4	4	16
3	167	16713	1	1	0	75	1	2	2	1	1	1	1	0	17	8	15	84	27	49	10	2	1	1	3	1	4	4	14
3	168	16813	1	1	0	69	2	1	2	1	1	1	0	0	26	18	18	93	28	30	5	11	1	1	2	2	3	4	13
3	169	16913	1	1	0	78	1	2	2	1	1	1	1	0	25	16	12	95	28	50	5	5	2	2	3	2	3	4	16
3	170	17013	1	1	0	81	1	2	2	1	1	2	0	0	20	12	13	93	27	41	7	5	2	3	3	2	3	3	16
3	171	17113	1	1	1	67	2	1	2	0	1	2	0	0	12	18	11	108	27	55	5	0	4	3	3	3	3	3	19
3	173	17313	1	1	0	62	1	1	2	1	0	1	0	0	23	16	15	119	27	56	3	3	3	2	3	3	3	3	17
3	174	17413	1	1	0	74	1	2	2	1	1	1	0	0	21	18	13	104	23	24	4	8	1	3	3	2	4	4	17
3	175	17513	1	1	1	84	1	2	2	1	0	1	0	0	6	15	10	77	24	54	9	1	4	4	3	4	5	5	25
3	176	17613	1	1	1	77	1	2	2	0	1	1	1	0	15	14	17	130	25	49	10	5	4	4	3	1	3	3	18
3	177	17713	1	1	1	77	1	2	2	0	1	3	0	0	16	13	14	105	28	54	5	1	4	3	3	3	3	3	19
3	178	17813	1	1	0	71	1	2	1	1	0	1	1	0	15	19	14	82	25	53	3	3	3	3	3	2	3	4	18
3	179	17913	1	1	1	85	2	2	2	1	1	1	1	0	18	20	16	94	22	22	8	4	1	2	3	3	4	4	17
3	180	18013	1	1	0	65	2	1	2	1	0	1	0	0	23	7	14	125	32	52	7	5	2	1	3	3	4	4	17
3	182	18213	1	1	1	90	2	2	2	1	1	1	1	0	9	16	13	108	15	54	1	2	3	3	3	3	3	2	17
3	183	18313	1	1	0	75	1	2	2	1	0	1	0	0	27	17	15	110	19	50	2	1	2	3	2	3	3	4	17
3	184	18413	1	1	1	85	1	1	2	1	0	1	0	0	22	6	15	87	23	39	9	1	1	2	2	1	4	4	14
3	185	18513	1	1	1	81	3	2	2	1	1	1	0	0	11	12	11	77	19	53	3	1	3	3	4	3	4	4	21
3	186	18613	1	1	1	62	2	1	2	1	1	3	0	0	12	8	9	77	21	56	2	3	2	2	2	3	4	4	17
3	187	18713	1	1	0	65	1	2	2	1	1	3	0	0	30	17	17	100	22	19	2	4	1	1	2	2	3	3	12
3	188	18813	1	1	0	92	1	2	2	1	0	1	1	0	18	18	14	94	19	44	4	1	2	2	3	2	4	4	17
3	189	18913	1	1	0	78	1	1	2	1	1	1	0	0	22	15	15	109	22	51	3	4	1	2	4	2	4	4	17
3	190	19013	1	1	1	66	2	1	2	1	1	3	0	0	26	12	14	98	30	56	5	2	2	2	3	2	4	4	17
3	191	19113	1	1	1	82	2	1	2	1	1	2	0	0	22	16	18	72	29	44	3	8	1	3	3	2	4	4	17
3	192	19213	1	1	0	74	1	2	2	1	1	1	0	0	23	18	14	103	18	52	0	3	2	3	2	3	4	4	18
3	193	19313	1	1	1	79	2	2	3	1	1	3	1	0	6	13	11	85	32	31	5	3	2	2	4	2	4	4	18
3	194	19413	1	1	1	82	1	2	2	1	0	2	1	0	22	19	15	105	24	48	4	4	1	2	3	2	4	4	16
3	195	19513	1	1	1	69	3	1	2	1	1	1	0	0	20	6	11	95	32	47	10	4	2	2	3	3	4	4	18
3	196	19613	1	1	0	60	2	1	1	0	1	3	0	0	8	19	8	83	14	56	2	3	4	4	3	3	2	4	20
3	197	19713	1	1	0	63	1	1	2	1	1	2	0	0	27	17	18	110	18	22	3	5	2	2	3	2	3	3	15
3	198	19813	1	1	0	72	1	1	2	1	1	1	0	0	26	17	16	98	22	38	6	4	1	1	2	1	4	4	13
3	199	19913	1	1	1	77	1	1	2	1	1	2	0	0	27	14	15	95	30	46	5	3	2	1	3	2	3	2	13
3	200	20013	1	1	1	75	1	1	2	1	1	2	0	0	25	8	17	79	31	51	10	2	1	1	3	2	4	4	15
3	202	20213	1	1	1	83	2	1	2	1	1	1	0	0	26	14	17	105	24	22	9	4	1	1	3	1	3	3	12
3	203	20313	1	1	0	82	1	2	2	1	0	1	1	0	8	16	12	101	22	56	10	2	3	4	3	3	4	4	21
3	204	20413	1	1	0	68	3	1	2	1	0	3	0	0	25	16	16	95	22	55	9	3	1	1	3	2	4	4	15
3	205	20513	1	1	0	62	1	1	2	0	1	3	0	0	21	15	14	90	20	55	0	2	4	3	2	3	2	4	18
3	206	20613	1	1	1	62	1	1	2	1	0	1	0	0	24	12	18	118	21	56	4	3	2	2	3	2	2	3	14
3	207	20713	1	1	1	85	1	2	1	1	0	1	1	0	13	12	14	92	22	51	5	2	4	4	3	1	3	3	18
3	208	20813	1	1	0	79	1	1	2	1	1	1	0	0	26	12	10	82	22	17	10	6	2	2	3	1	4	4	16
3	209	20913	1	1	0	69	1	1	2	1	1	3	0	0	25	12	8	70	24	51	5	2	2	2	4	2	4	4	18
3	210	21013	1	1	0	75	1	2	2	1	1	1	1	0	15	12	12	82	24	54	7	3	1	1	3	1	3	3	12
3	212	21213	1	1	1	79	2	2	2	1	1	2	1	0	16	9	13	72	29	42	9	2	2	3	3	1	4	4	17
3	213	21313	1	1	1	78	1	2	2	1	0	1	1	0	25	15	17	87	23	53	8	7	1	2	3	1	4	4	15
3	214	21413	1	1	1	61	1	1	2	1	0	3	0	0	27	14	20	80	28	17	7	5	1	1	3	1	4	4	14
3	215	21513	1	1	1	70	2	1	2	1	1	2	0	0	22	11	11	69	28	21	10	7	1	2	2	1	3	4	13
3	216	21613	1	1	1	79	2	1	2	1	1	1	0	0	26	17	16	86	27	25	1	7	1	2	2	1	4	4	14
3	217	21713	1	1	1	79	2	2	2	1	1	1	1	0	27	19	16	111	29	54	2	4	1	1	3	2	4	4	15
3	218	21813	1	1	1	60	2	2	2	1	1	3	1	0	23	12	18	103	27	56	5	5	2	2	2	3	3	3	15
3	219	21913	1	1	0	77	1	2	2	0	1	3	0	0	24	13	13	94	25	42	7	3	1	2	3	1	4	4	15
3	220	22013	1	1	1	78	1	1	1	1	1	2	0	0	28	16	19	81	18	36	7	7	1	1	2	1	4	4	13
3	221	22113	1	1	1	66	4	1	2	1	0	2	0	0	29	20	14	91	27	56	8	3	2	1	3	3	4	4	17
3	222	22213	1	1	1	77	4	1	2	1	0	3	0	0	28	8	15	84	33	55	9	3	3	1	3	3	4	4	18
3	223	22313	1	1	1	62	2	1	1	1	1	2	0	0	28	16	16	74	21	24	4	4	1	2	2	1	5	4	15
3	224	22413	1	1	0	62	2	1	1	1	1	3	0	0	28	6	17	80	39	56	10	3	2	1	3	2	4	4	16
3	225	22513	1	1	0	78	1	2	2	1	0	3	0	0	19	16	15	62	30	53	2	3	3	3	3	4	3	4	20
3	226	22613	1	1	1	92	2	1	1	1	1	1	0	0	23	8	19	113	37	55	10	2	1	1	3	2	4	4	15
3	228	22813	1	1	0	62	1	1	2	1	1	3	0	0	24	12	12	66	32	56	10	1	2	3	2	2	4	4	17
3	229	22913	1	1	1	72	2	1	1	1	1	1	0	0	30	18	18	81	23	55	10	7	2	1	2	2	4	4	15
3	230	23013	1	1	1	83	1	1	2	1	1	1	0	0	9	7	10	77	33	52	7	2	2	3	3	3	4	4	19
3	231	23113	1	1	0	66	2	1	1	1	1	2	0	0	26	6	18	71	41	45	10	3	1	1	3	2	5	5	17
3	232	23213	1	1	0	76	1	2	2	1	0	3	0	0	17	16	14	95	33	49	4	1	2	2	3	2	4	4	17
3	233	23313	1	1	0	77	1	2	2	0	1	1	0	0	28	13	15	77	33	56	5	3	2	1	2	3	4	4	16
3	234	23413	1	1	1	81	1	1	1	1	1	1	0	0	30	13	17	101	25	20	7	5	1	2	3	2	4	4	16
3	236	23613	1	1	0	73	1	2	1	1	1	1	1	0	14	16	18	95	30	56	5	4	3	3	3	3	4	4	20
3	237	23713	1	1	1	63	3	1	2	1	0	3	0	0	27	6	16	90	33	54	9	4	2	2	3	2	4	4	17
3	238	23813	1	1	1	61	3	1	2	0	1	2	0	0	20	6	12	72	34	56	10	1	3	2	3	3	4	4	19
3	240	24013	1	1	1	62	3	1	2	1	1	2	0	0	30	19	17	104	29	54	3	6	2	2	2	2	3	3	14
3	241	24113	1	1	0	63	1	1	2	0	1	1	0	0	28	6	14	89	24	54	4	2	3	2	3	2	4	4	18
3	242	24213	1	1	0	79	1	1	2	1	1	1	0	0	27	8	15	78	35	33	7	6	2	3	2	2	4	4	17
3	243	24313	1	1	0	60	1	2	2	1	0	3	0	0	22	18	14	85	24	56	2	2	3	2	3	3	4	3	18
3	244	24413	1	1	0	62	1	2	2	1	0	2	1	0	25	20	11	106	31	52	3	2	2	2	3	3	4	3	17
1	1	113	1	1	1	63	2	1	1	1	0	2	0	1	19	12	13	83	20	16	4	6	3	3	2	1	4	4	17
1	3	313	1	1	1	70	2	1	2	0	1	2	0	1	25	21	14	114	21	56	0	12	1	1	1	1	2	3	9
1	13	1313	1	1	1	80	2	1	3	1	1	2	0	1	25	7	18	90	23	23	3	10	1	1	2	1	4	3	12
1	17	1713	1	1	1	62	2	1	2	1	1	2	0	1	20	15	14	118	23	52	6	8	1	2	2	3	3	3	14
1	23	2313	1	1	1	70	3	2	2	1	1	2	0	1	17	24	14	102	22	56	8	4	1	1	1	1	4	4	12
1	27	2713	1	1	1	83	1	2	2	1	1	2	0	1	8	10	17	121	25	50	6	7	1	4	4	2	3	4	18
1	37	3713	1	1	1	76	2	1	2	1	1	2	0	1	22	12	13	77	18	32	5	5	2	2	3	2	4	4	17
1	41	4113	1	1	1	60	2	1	2	1	1	2	0	1	30	19	18	115	12	17	0	10	1	1	1	1	2	3	9
1	45	4513	1	1	1	78	2	1	1	1	1	2	0	1	25	15	16	77	24	52	5	7	2	1	2	2	3	4	14
1	49	4913	1	1	1	72	2	1	2	1	1	1	0	1	28	18	16	111	25	22	4	7	1	1	2	1	1	2	8
1	51	5113	1	1	0	65	2	1	2	1	1	1	0	1	24	13	16	123	23	54	0	5	2	2	2	2	3	3	14
1	53	5313	1	1	1	65	2	1	2	1	1	3	0	1	26	20	15	95	21	14	5	9	1	1	2	1	2	3	10
1	57	5713	1	1	0	75	1	1	1	1	0	2	0	1	27	12	15	83	25	52	6	7	1	1	2	1	2	3	10
1	59	5913	1	1	1	63	1	1	2	1	1	1	0	1	27	14	15	122	25	56	4	8	2	2	2	2	3	3	14
1	62	6213	1	1	1	72	3	1	2	1	1	3	0	1	24	12	14	100	30	56	5	8	1	1	3	2	3	3	13
1	69	6913	1	1	0	62	2	2	2	1	1	3	1	1	29	24	16	105	26	56	3	11	3	2	3	3	2	3	16
1	71	7113	1	1	1	65	2	1	2	0	1	3	0	1	24	15	14	97	27	56	2	3	3	3	3	3	1	2	15
1	73	7313	1	1	1	75	2	2	2	1	1	3	0	1	20	21	15	105	13	44	0	8	1	1	2	2	2	3	11
1	80	8013	1	1	1	73	1	1	2	1	1	2	0	1	21	20	14	105	20	56	0	6	2	2	3	3	2	3	15
2	91	9113	1	1	1	77	3	2	2	1	1	2	1	1	22	23	14	98	11	56	0	5	1	2	3	2	3	3	14
2	93	9313	1	1	0	68	1	1	2	0	1	3	0	1	11	12	11	110	15	56	0	6	4	4	3	3	2	4	20
2	99	9913	1	1	1	69	2	1	2	1	1	1	0	1	28	21	17	108	23	22	5	11	1	1	1	1	2	2	8
2	101	10113	1	1	0	70	3	1	2	1	0	2	1	1	20	20	14	87	19	53	1	8	2	2	4	2	2	3	15
2	119	11913	1	1	1	77	1	1	2	1	1	2	0	1	19	20	8	126	19	56	0	8	4	4	3	4	2	4	21
2	124	12413	1	1	1	60	2	1	1	1	1	2	0	1	12	12	14	79	27	56	6	2	2	3	4	3	4	4	20
2	131	13113	1	1	0	68	2	2	2	1	1	2	1	1	30	24	19	116	11	56	0	9	1	1	1	1	2	2	8
2	132	13213	1	1	1	77	2	1	2	0	1	2	0	1	25	24	14	134	17	56	1	4	3	3	4	3	1	1	15
2	133	13313	1	1	1	62	2	2	2	1	0	2	1	1	16	16	19	111	23	56	5	6	1	1	1	1	4	4	12
2	137	13713	1	1	1	63	2	1	2	1	1	1	0	1	22	24	14	118	22	39	0	10	1	1	1	1	2	3	9
2	140	14013	1	1	1	63	3	1	1	1	0	3	0	1	26	15	19	83	24	56	8	4	2	1	2	1	4	4	14
2	142	14213	1	1	1	75	4	2	2	1	0	1	1	1	21	24	18	103	21	51	4	6	1	1	2	2	4	4	14
2	145	14513	1	1	1	75	1	2	2	1	1	1	1	1	25	23	18	80	14	56	0	5	2	1	3	2	2	3	13
2	151	15113	1	1	1	75	2	2	2	1	1	1	1	1	29	24	17	110	16	51	1	7	1	1	2	1	3	2	10
3	164	16413	1	1	1	75	2	2	2	1	1	1	0	1	13	12	14	100	25	31	0	2	1	1	3	3	4	4	16
3	172	17213	1	1	1	78	1	2	2	1	1	1	1	1	24	19	17	126	21	29	2	6	1	2	2	1	2	2	10
3	181	18113	1	1	1	68	1	2	2	1	1	2	1	1	24	19	17	109	14	56	3	3	2	2	3	2	3	3	15
3	201	20113	1	1	0	61	1	1	2	1	0	2	0	1	27	11	17	102	25	56	10	1	2	2	3	3	4	4	18
3	211	21113	1	1	1	69	2	1	2	1	0	1	1	1	28	19	10	125	22	52	8	5	2	1	1	1	4	2	11
3	227	22713	1	1	0	82	1	1	1	1	0	3	0	1	29	6	18	127	18	46	10	1	2	2	2	2	3	3	14
3	235	23513	1	1	0	78	1	1	2	1	0	1	1	1	26	24	15	90	12	54	0	5	1	2	2	3	3	4	15
3	239	23913	1	1	1	74	2	2	2	1	0	1	1	1	25	16	18	68	30	41	3	7	1	2	3	1	3	3	13
1	1	123	2	0	1	61	2	1	1	0	1	3	0	0	7	6	5	86	25	56	7	0	4	3	3	3	4	4	21
1	2	223	2	0	1	82	2	1	2	1	1	2	0	0	5	9	5	81	25	55	10	10	3	3	5	4	5	5	25
1	3	323	2	0	1	70	2	1	2	0	1	2	0	0	5	12	4	58	26	56	10	0	3	4	3	4	4	4	22
1	4	423	2	0	0	62	2	1	1	0	1	3	0	0	12	9	5	101	31	55	10	1	3	4	1	4	4	4	20
1	5	523	2	0	1	85	2	2	1	1	1	3	0	0	13	6	12	129	21	56	10	3	3	2	2	3	3	3	16
1	6	623	2	0	1	78	2	1	1	0	1	1	0	0	11	6	9	82	14	55	8	2	4	3	3	3	4	3	20
1	7	723	2	0	0	83	1	2	2	1	1	2	0	0	21	13	14	98	14	40	1	7	3	2	1	2	4	4	16
1	8	823	2	0	1	85	2	2	1	1	1	2	0	0	18	18	12	113	12	49	8	5	3	1	3	3	3	4	17
1	9	923	2	0	0	76	2	1	2	0	1	3	0	0	16	10	12	97	16	52	6	10	2	1	1	1	3	4	12
1	10	1023	2	0	0	84	2	2	2	1	1	3	0	0	9	12	11	100	14	55	5	9	2	3	3	3	3	3	17
1	11	1123	2	0	0	78	2	1	2	1	0	2	0	0	8	9	12	103	17	50	2	6	3	3	2	3	3	3	17
1	12	1223	2	0	1	81	2	1	2	1	1	2	0	0	2	6	6	74	26	56	8	1	3	3	3	4	5	4	22
1	13	1323	2	0	1	80	2	1	3	1	1	2	0	0	13	6	9	45	38	55	10	4	4	4	4	3	4	3	22
1	14	1423	2	0	0	82	1	2	2	1	1	2	0	0	14	18	13	97	25	40	6	4	1	3	3	3	3	3	16
1	15	1523	2	0	0	86	1	1	2	1	1	1	0	0	25	21	16	127	18	32	0	11	1	1	1	1	3	3	10
1	16	1623	2	0	1	78	2	1	2	0	1	2	0	0	12	11	8	82	31	56	7	4	3	4	3	3	4	4	21
1	17	1723	2	0	1	61	3	1	2	0	1	2	0	0	0	6	9	47	37	56	10	0	3	3	4	3	4	4	21
1	19	1923	2	0	1	62	2	1	2	1	0	2	0	0	4	10	9	82	16	56	10	1	3	3	3	3	4	4	20
1	20	2023	2	0	0	84	2	2	2	1	0	3	0	0	12	11	8	105	27	47	10	2	3	3	3	3	3	3	18
1	21	2123	2	0	1	82	3	1	2	1	1	2	0	0	12	10	11	77	30	14	7	6	1	5	4	1	4	4	19
1	23	2323	2	0	1	74	2	1	2	0	1	3	0	0	3	8	10	88	25	56	2	8	3	3	3	3	2	3	17
1	24	2423	2	0	0	82	1	2	2	0	1	3	0	0	22	11	13	101	29	43	9	6	3	2	2	2	3	3	15
1	25	2523	2	0	1	70	2	1	2	1	1	2	0	0	14	15	15	117	20	54	5	6	4	4	2	3	4	4	21
1	26	2623	2	0	0	81	1	1	1	1	1	1	0	0	15	12	10	112	23	54	9	7	1	2	2	2	4	4	15
1	27	2723	2	0	1	83	4	1	2	1	1	1	0	0	7	9	11	83	20	56	8	5	3	4	4	3	4	4	22
1	28	2823	2	0	1	66	2	1	1	0	1	2	0	0	11	13	18	113	33	56	7	7	1	2	2	3	4	3	15
1	29	2923	2	0	0	73	2	1	2	1	1	2	0	0	13	15	10	104	24	53	9	7	3	3	2	3	4	4	19
1	30	3023	2	0	1	63	2	1	2	1	1	1	0	0	24	12	18	116	24	48	0	10	1	2	2	2	3	3	13
1	31	3123	2	0	1	78	2	1	2	1	1	2	0	0	20	11	17	92	25	50	9	9	2	3	2	1	2	3	13
1	32	3223	2	0	0	72	2	2	2	1	1	2	1	0	8	13	8	91	27	56	9	7	4	4	3	4	4	4	23
1	33	3323	2	0	0	67	2	1	1	1	1	2	0	0	9	6	10	83	24	56	5	8	3	4	3	3	4	3	20
1	34	3423	2	0	1	76	2	1	2	1	1	2	0	0	15	13	12	98	24	56	4	7	2	3	2	2	4	3	16
1	35	3523	2	0	0	68	1	1	2	1	1	2	0	0	21	14	14	94	21	56	5	8	3	3	3	3	3	4	19
1	36	3623	2	0	1	77	2	2	2	0	1	2	1	0	9	17	8	70	28	56	6	5	4	4	4	4	5	5	26
1	37	3723	2	0	1	77	2	1	2	1	1	2	0	0	22	9	13	84	27	56	10	9	3	3	2	2	3	3	16
1	38	3823	2	0	1	78	1	1	2	1	1	2	0	0	20	10	13	104	22	38	5	6	2	2	2	2	4	4	16
1	39	3923	2	0	0	84	2	2	2	1	0	1	1	0	12	6	13	108	21	50	5	7	4	3	2	2	4	4	19
1	40	4023	2	0	1	86	1	2	2	0	1	3	0	0	12	12	10	118	25	49	5	4	3	4	2	2	3	3	17
1	42	4223	2	0	1	77	2	1	2	0	1	3	0	0	5	9	10	84	25	56	0	3	2	3	2	3	3	3	16
1	43	4323	2	0	1	82	2	2	3	1	1	2	1	0	14	14	9	86	35	53	6	8	3	3	3	3	4	4	20
1	44	4423	2	0	0	82	2	2	1	1	1	2	0	0	14	17	10	75	30	38	7	10	3	4	2	1	4	4	18
1	46	4623	2	0	0	78	1	1	1	1	0	2	0	0	8	6	13	86	24	56	3	10	2	4	3	2	4	2	17
1	48	4823	2	0	1	68	2	1	2	1	1	2	0	0	20	12	14	89	23	56	5	6	4	4	3	4	4	4	23
1	49	4923	2	0	1	72	2	1	1	1	1	3	0	0	8	9	9	92	23	56	7	5	3	3	2	3	4	3	18
1	50	5023	2	0	1	84	2	1	1	0	1	1	0	0	9	24	12	89	13	56	5	5	2	3	3	3	3	3	17
1	52	5223	2	0	0	75	2	1	1	0	1	2	0	0	3	6	4	56	25	56	10	1	4	4	3	4	5	5	25
1	57	5723	2	0	0	74	2	1	1	1	1	3	0	0	20	15	12	112	20	56	5	7	3	3	2	2	3	2	15
1	59	5923	2	0	1	64	3	1	2	1	0	1	0	0	3	6	10	90	27	56	10	4	3	3	3	4	4	4	21
1	60	6023	2	0	0	60	2	1	1	1	1	2	0	0	7	6	10	100	31	54	10	4	2	3	4	3	4	3	19
1	61	6123	2	0	0	74	1	2	2	1	1	1	1	0	20	15	11	84	27	56	8	6	2	2	3	2	3	3	15
1	62	6223	2	0	1	71	3	1	1	1	0	3	0	0	16	7	11	84	25	56	10	3	3	3	3	3	3	4	19
1	63	6323	2	0	0	60	2	1	2	1	1	2	0	0	14	14	11	100	31	56	5	3	2	2	2	2	3	3	14
1	65	6523	2	0	1	63	3	2	1	1	1	2	0	0	4	11	11	82	30	56	8	5	2	3	3	3	4	4	19
1	66	6623	2	0	1	91	1	1	2	1	1	2	0	0	17	10	11	108	24	43	5	3	3	3	3	2	4	4	19
1	68	6823	2	0	0	79	1	1	2	1	0	1	0	0	13	6	15	100	24	43	4	3	3	3	3	2	4	3	18
1	69	6923	2	0	0	62	1	1	1	0	1	3	0	0	7	14	13	95	23	56	9	0	3	4	2	3	4	3	19
1	70	7023	2	0	1	85	1	1	2	0	1	2	0	0	5	11	9	102	23	54	5	6	4	4	4	3	3	2	20
1	71	7123	2	0	1	64	2	1	2	1	1	2	0	0	15	14	12	98	24	56	5	8	3	4	3	2	4	3	19
1	72	7223	2	0	0	65	2	1	1	1	0	3	0	0	14	6	9	94	31	56	10	5	4	4	3	3	3	3	20
1	73	7323	2	0	1	75	2	2	2	1	1	3	0	0	9	6	6	97	27	50	9	7	2	4	2	1	5	5	19
1	74	7423	2	0	1	90	2	2	2	1	1	2	0	0	16	12	12	115	25	40	7	11	3	3	2	1	3	4	16
1	75	7523	2	0	1	75	2	2	1	1	1	3	0	0	13	14	11	106	26	56	4	9	2	2	2	2	3	3	14
1	76	7623	2	0	0	79	2	2	2	1	1	1	1	0	29	17	12	116	21	48	3	8	3	3	2	2	3	3	16
1	77	7723	2	0	1	75	2	1	2	1	1	2	0	0	9	13	8	98	34	56	2	7	2	2	2	2	3	3	14
1	78	7823	2	0	0	87	2	2	2	0	1	1	1	0	4	7	12	94	27	55	9	5	3	3	2	2	4	4	18
2	81	8123	2	0	1	77	1	1	2	1	1	2	0	0	5	9	11	125	21	56	9	6	2	3	3	3	5	5	21
2	82	8223	2	0	0	75	1	2	1	1	1	3	0	0	13	10	13	106	23	54	8	11	2	2	2	2	2	4	14
2	84	8423	2	0	0	82	1	1	2	1	1	2	0	0	2	12	8	104	27	49	8	8	3	3	3	3	4	3	19
2	86	8623	2	0	0	92	1	2	2	0	1	1	1	0	16	19	5	78	29	48	3	8	2	3	3	2	5	4	19
2	87	8723	2	0	0	86	1	2	2	0	1	2	0	0	15	19	12	109	19	50	5	5	3	3	2	2	4	3	17
2	88	8823	2	0	1	78	1	1	2	0	1	2	0	0	23	19	12	100	23	56	6	2	2	2	2	3	4	4	17
2	89	8923	2	0	0	72	2	1	1	0	1	2	0	0	5	12	8	75	27	56	10	5	4	4	3	4	4	4	23
2	90	9023	2	0	1	77	1	1	2	0	1	2	0	0	8	10	13	130	17	56	7	1	3	3	3	3	4	4	20
2	91	9123	2	0	1	68	2	1	2	0	1	2	0	0	6	12	11	80	28	56	6	0	4	3	3	3	4	4	21
2	93	9323	2	0	0	61	2	2	1	0	1	2	0	0	23	18	13	118	31	56	6	9	3	3	2	3	4	4	19
2	94	9423	2	0	1	78	2	2	1	1	0	2	1	0	25	20	14	104	16	56	0	16	3	3	2	2	3	4	17
2	95	9523	2	0	0	73	2	2	1	0	1	1	0	0	14	18	12	115	15	53	4	9	3	3	3	2	2	3	16
2	96	9623	2	0	1	77	2	1	1	1	1	2	0	0	8	15	12	85	30	56	6	6	2	3	3	1	4	5	18
2	97	9723	2	0	0	81	1	1	2	0	1	2	0	0	3	16	9	76	26	52	7	0	3	4	3	4	4	4	22
2	98	9823	2	0	1	77	4	2	3	0	1	3	0	0	3	10	12	75	33	56	9	2	3	4	3	3	4	4	21
2	99	9923	2	0	1	68	2	1	2	1	0	2	0	0	13	12	13	111	26	56	5	4	2	4	3	3	4	4	20
2	100	10023	2	0	0	58	2	1	1	1	1	2	0	0	3	12	10	70	15	56	7	5	2	3	3	3	4	4	19
2	101	10123	2	0	0	63	2	1	2	0	1	1	0	0	11	18	12	90	25	56	6	2	3	3	3	4	3	4	20
2	102	10223	2	0	0	80	1	2	1	1	1	1	1	0	15	13	10	87	16	53	3	8	2	4	2	2	3	4	17
2	103	10323	2	0	0	77	2	2	1	1	1	2	0	0	9	12	9	91	31	54	6	4	3	4	3	3	3	4	20
2	104	10423	2	0	1	76	3	1	2	0	1	1	0	0	11	10	9	104	29	56	5	4	4	4	3	3	4	4	22
2	105	10523	2	0	0	73	2	1	1	0	1	3	0	0	6	9	13	94	20	54	10	3	3	4	3	3	3	3	19
2	106	10623	2	0	1	76	3	1	1	1	0	3	0	0	9	13	13	72	28	54	7	5	2	2	3	3	4	4	18
2	107	10723	2	0	0	76	1	2	1	1	1	2	1	0	6	15	12	82	26	53	6	8	3	4	2	3	3	4	19
2	108	10823	2	0	0	82	1	1	1	0	1	1	0	0	1	12	8	87	31	56	4	1	3	3	3	3	4	4	20
2	109	10923	2	0	0	64	2	1	2	1	1	1	0	0	2	12	9	66	28	55	10	2	2	2	2	2	4	3	15
2	110	11023	2	0	1	72	1	1	1	1	1	1	0	0	7	14	11	78	26	56	5	2	4	4	3	2	4	4	21
2	111	11123	2	0	1	70	1	1	3	1	1	1	0	0	16	12	13	73	34	56	5	5	3	3	2	2	4	4	18
2	113	11323	2	0	1	78	4	1	3	1	1	3	0	0	6	19	9	95	16	56	6	15	3	4	2	3	4	1	17
2	114	11423	2	0	1	62	1	1	1	1	1	3	1	0	11	20	10	83	14	56	5	5	2	4	3	4	4	4	21
2	115	11523	2	0	1	73	3	1	2	1	0	2	0	0	7	8	10	68	34	56	0	3	3	4	3	3	4	4	21
2	116	11623	2	0	1	74	1	2	1	1	1	3	1	0	28	21	14	112	16	52	1	11	3	3	2	2	2	2	14
2	117	11723	2	0	0	78	2	1	1	1	1	1	0	0	9	8	8	79	23	53	9	2	3	4	4	3	3	3	20
2	120	12023	2	0	0	81	1	2	2	0	1	3	0	0	12	15	10	85	27	53	8	1	5	5	3	3	3	3	22
2	121	12123	2	0	1	80	2	1	2	1	1	2	0	0	19	15	9	83	25	56	8	3	3	3	2	3	4	4	19
2	122	12223	2	0	0	61	2	1	1	0	1	2	0	0	4	8	7	59	29	56	7	0	4	4	3	4	4	4	23
2	123	12323	2	0	0	60	2	1	2	1	1	2	0	0	14	16	7	93	23	54	8	5	3	3	2	3	4	3	18
2	124	12423	2	0	1	59	4	1	1	0	1	2	0	0	7	12	11	84	17	52	5	3	4	3	2	3	4	3	19
2	125	12523	2	0	1	82	2	2	1	1	1	2	1	0	2	13	8	72	14	56	2	7	3	4	3	3	4	4	21
2	126	12623	2	0	0	80	1	2	2	0	1	2	0	0	4	10	11	94	21	56	7	1	4	4	4	3	3	2	20
2	127	12723	2	0	0	76	2	2	2	0	1	2	0	0	4	12	9	70	25	56	8	1	3	4	4	2	4	4	21
2	128	12823	2	0	0	72	1	2	2	1	1	3	0	0	14	18	14	88	27	53	7	8	2	2	2	2	3	3	14
2	129	12923	2	0	1	67	2	1	2	0	1	3	0	0	3	12	9	74	34	56	9	1	4	4	4	3	4	4	23
2	130	13023	2	0	1	72	2	1	2	1	1	3	0	0	15	14	14	86	21	56	2	6	3	3	2	2	3	3	16
2	131	13123	2	0	0	67	2	1	2	1	1	3	0	0	10	11	12	86	28	55	4	3	3	3	3	3	3	3	18
2	132	13223	2	0	1	76	2	1	2	1	1	3	0	0	22	11	14	93	36	48	9	3	2	2	3	2	3	3	15
2	133	13323	2	0	1	63	3	1	1	0	1	2	0	0	5	11	9	85	26	56	6	0	4	4	3	4	4	4	23
2	134	13423	2	0	0	63	2	1	2	0	1	3	0	0	9	13	11	84	27	56	7	2	3	3	3	3	3	3	18
2	135	13523	2	0	0	85	2	2	2	0	1	3	0	0	3	11.02	11	83	22	56	3	5	4	4	4	4	2	4	22
2	136	13623	2	0	1	84	1	1	2	1	1	1	0	0	27	19	12	102	21	55	1	5	3	2	3	2	2	3	15
2	137	13723	2	0	1	66	2	1	1	0	1	3	0	0	4	12	10	78	24	56	2	3	2	3	3	3	3	3	17
2	138	13823	2	0	0	86	1	1	2	1	1	1	0	0	15	12	10	83	27	49	8	2	2	3	3	2	3	3	16
2	139	13923	2	0	0	78	2	1	2	1	1	1	0	0	15	12	15	93	25	44	4	3	3	3	3	2	3	3	17
2	140	14023	2	0	1	63	3	1	1	1	1	2	0	0	12	10	10	82	28	56	9	5	3	3	3	3	3	3	18
2	141	14123	2	0	1	79	2	1	2	1	1	3	0	0	8	13	14	101	29	56	7	3	2	3	3	2	3	3	16
2	142	14223	2	0	1	78	2	1	2	0	1	1	0	0	5	12	9	77	16	56	10	3	3	3	3	2	3	3	17
2	143	14323	2	0	0	73	1	2	2	1	1	1	1	0	8	11	8	94	19	56	7	7	3	4	3	4	3	3	20
2	144	14423	2	0	1	82	2	2	2	0	1	2	0	0	12	12	12	101	17	54	4	1	4	3	3	2	3	3	18
2	145	14523	2	0	1	78	1	1	2	0	1	3	0	0	2	15	9	73	20	56	7	3	3	3	3	3	3	3	18
2	146	14623	2	0	1	64	4	1	2	0	1	3	0	0	2	11	8	80	39	56	10	0	4	3	4	4	4	4	23
2	147	14723	2	0	1	64	4	1	3	0	1	3	0	0	0	12	8	62	28	56	8	2	3	3	4	4	4	4	22
2	148	14823	2	0	1	61	2	1	1	0	1	2	0	0	8	12	9	72	25	56	5	1	4	4	3	3	4	4	22
2	150	15023	2	0	1	78	2	1	1	1	1	3	0	0	4	12	8	74	28	56	9	0	4	4	3	4	4	4	23
2	151	15123	2	0	1	72	4	1	3	0	1	3	0	0	4	12	8	73	33	56	9	0	4	4	4	3	4	4	23
2	152	15223	2	0	0	77	1	1	1	1	1	1	0	0	5	13	8	86	24	56	7	2	2	3	3	3	4	4	19
3	153	15323	2	0	1	70	2	1	2	1	1	2	0	0	3	8	8	77	26	56	9	0	3	3	3	4	4	4	21
3	154	15423	2	0	0	76	1	1	2	1	1	2	0	0	14	13	11	103	31	49	10	5	1	3	3	2	4	4	17
3	155	15523	2	0	1	71	3	1	2	1	1	1	0	0	9	12	10	96	23	56	9	2	3	4	3	3	5	4	22
3	156	15623	2	0	0	85	1	2	2	1	1	2	0	0	3	8	8	90	36	49	10	0	3	4	3	3	4	4	21
3	157	15723	2	0	0	85	2	2	2	1	0	3	0	0	4	6	8	102	30	47	10	2	4	4	5	2	4	4	23
3	158	15823	2	0	1	62	1	1	2	1	1	3	0	0	8	11	12	91	29	53	7	0	4	4	3	3	4	4	22
3	159	15923	2	0	0	78	1	2	2	0	1	1	0	0	13	12	11	96	20	49	5	3	4	4	3	4	4	4	23
3	160	16023	2	0	0	63	1	1	2	1	1	3	0	0	18	14	9	109	27	49	10	4	3	4	3	2	5	5	22
3	161	16123	2	0	1	79	2	1	2	1	0	1	0	0	6	13	10	87	32	36	10	2	3	3	3	1	4	4	18
3	162	16223	2	0	0	75	1	2	1	1	1	3	0	0	6	8	8	96	30	56	9	1	4	4	4	4	4	4	24
3	163	16323	2	0	1	75	2	1	3	1	1	3	0	0	5	12	7	83	31	56	6	1	4	4	4	4	4	4	24
3	165	16523	2	0	0	74	1	1	2	1	1	1	0	0	10	12	11	100	25	54	7	3	4	4	3	3	4	4	22
3	166	16623	2	0	1	79	2	1	2	0	1	3	0	0	3	6	11	76	34	53	10	0	4	4	4	4	5	5	26
3	167	16723	2	0	0	78	2	1	1	1	1	2	0	0	17	12	11	87	28	55	6	4	3	4	4	3	4	4	22
3	168	16823	2	0	0	72	2	1	2	1	0	2	0	0	7	6	8	100	26	55	10	2	3	4	3	3	4	4	21
3	169	16923	2	0	0	78	1	1	2	1	1	1	0	0	3	6	8	85	31	39	10	3	2	3	3	2	4	4	18
3	170	17023	2	0	0	79	1	2	2	1	1	3	0	0	15	12	10	94	27	47	6	4	4	4	4	3	4	4	23
3	171	17123	2	0	1	64	3	1	2	1	0	1	0	0	5	10	6	80	36	56	6	2	3	3	3	3	4	4	20
3	174	17423	2	0	0	76	1	1	2	0	1	3	0	0	4	7	6	80	33	55	10	2	5	5	4	4	4	4	26
3	175	17523	2	0	1	85	1	2	2	1	0	1	0	0	3	10	10	77	30	52	8	2	3	4	2	4	4	4	21
3	176	17623	2	0	1	76	1	1	2	1	1	2	0	0	14	13	11	103	31	49	10	5	1	3	3	2	4	4	17
3	177	17723	2	0	1	74	1	1	3	1	1	3	0	0	10	12	8	88	24	54	6	4	2	4	3	3	3	4	19
3	178	17823	2	0	0	68	1	1	2	0	1	3	0	0	4	6	8	76	39	56	10	0	4	4	4	4	4	4	24
3	179	17923	2	0	1	79	3	2	1	1	1	1	1	0	5	12	8	90	28	51	10	7	3	4	3	3	3	3	19
3	180	18023	2	0	0	64	2	1	2	1	1	3	0	0	7	6	7	75	34	56	5	4	3	4	3	4	4	4	22
3	181	18123	2	0	1	75	1	1	2	1	1	3	0	0	4	12	8	77	34	56	7	3	3	4	4	4	4	4	23
3	182	18223	2	0	1	84	2	1	2	0	1	3	0	0	2	6	9	72	31	56	10	0	5	5	4	4	4	4	26
3	183	18323	2	0	0	71	1	2	2	0	1	1	1	0	5	12	9	91	24	53	5	0	3	3	3	3	4	4	20
3	184	18423	2	0	1	88	1	1	2	1	1	1	0	0	6	12	11	88	31	40	5	5	1	2	3	3	4	4	17
3	185	18523	2	0	1	80	1	1	2	1	0	1	0	0	10	14	11	63	27	52	9	4	2	3	2	3	4	4	18
3	186	18623	2	0	1	58	2	1	2	0	1	2	0	0	0	6	8	61	37	56	10	1	5	5	4	4	4	4	26
3	187	18723	2	0	0	62	1	1	2	1	1	2	0	0	6	13	12	88	29	50	7	0	3	4	3	3	4	4	21
3	188	18823	2	0	0	92	1	2	2	1	1	2	0	0	5	12	7	99	31	37	9	3	4	4	3	2	4	4	21
3	189	18923	2	0	0	80	1	1	2	1	1	1	0	0	22	12	8	101	31	50	5	2	2	3	3	3	4	4	19
3	190	19023	2	0	1	64	2	1	2	1	1	3	0	0	4	8	7	78	41	56	9	1	4	4	3	4	4	4	23
3	191	19123	2	0	1	85	2	2	2	0	1	1	1	0	6	12	8	86	36	56	10	1	4	4	4	3	3	3	21
3	192	19223	2	0	0	72	1	1	2	1	1	2	0	0	8	10	8	92	31	53	5	2	2	3	4	3	4	4	20
3	193	19323	2	0	1	81	1	1	2	0	1	1	0	0	5	12	8	88	28	52	6	3	3	3	2	3	4	4	19
3	194	19423	2	0	1	84	1	1	2	1	0	1	0	0	5	7	10	84	29	52	10	2	2	3	3	3	4	4	19
3	195	19523	2	0	1	71	3	1	1	1	1	1	0	0	6	12	8	86	30	53	9	2	2	4	3	2	4	4	19
3	196	19623	2	0	0	60	1	1	2	1	0	3	0	0	5	12	8	99	29	46	6	4	2	3	3	2	5	5	20
3	197	19723	2	0	0	60	2	1	2	0	1	2	0	0	6	9	7	77	33	56	6	1	4	4	3	4	4	4	23
3	198	19823	2	0	0	71	2	1	2	1	1	3	0	0	9	7	9	87	33	55	10	1	3	4	3	2	4	4	20
3	200	20023	2	0	1	74	3	1	3	0	1	2	0	0	1	6	5	58	24	56	9	0	5	5	3	3	4	4	24
3	201	20123	2	0	0	58	1	1	2	1	0	3	0	0	4	6	8	78	33	56	10	0	4	4	3	3	4	4	22
3	202	20223	2	0	1	80	1	2	2	1	0	1	1	0	9	8	7	62	32	53	10	5	2	4	3	3	4	4	20
3	203	20323	2	0	0	84	1	2	2	1	0	1	1	0	2	6	4	64	43	53	10	2	4	4	4	4	4	4	24
3	204	20423	2	0	0	65	1	1	2	0	1	1	0	0	2	6	4	57	44	53	10	4	4	4	4	4	4	4	24
3	205	20523	2	0	0	60	1	1	1	1	1	3	0	0	1	6	4	89	35	56	10	2	3	3	4	2	4	4	20
3	206	20623	2	0	1	62	3	2	2	0	1	1	0	0	3	6	7	69	39	56	10	3	4	4	4	4	4	4	24
3	207	20723	2	0	1	85	2	1	2	1	1	1	0	0	13	6	10	64	34	25	10	4	3	4	3	2	4	4	20
3	208	20823	2	0	0	82	1	2	2	0	1	1	1	0	4	7	9	73	33	55	9	3	4	4	3	2	4	4	21
3	209	20923	2	0	0	68	1	1	2	0	1	1	0	0	6	6	5	61	33	55	10	0	4	4	4	3	4	4	23
3	210	21023	2	0	0	78	2	1	2	1	1	1	0	0	4	6	13	68	35	53	10	2	3	3	3	3	4	4	20
3	211	21123	2	0	1	69	2	1	1	0	1	3	0	0	3	6	7	59	35	56	10	0	4	4	4	4	4	4	24
3	212	21223	2	0	1	77	2	1	2	0	1	1	0	0	5	9	7	83	30	54	6	0	3	3	4	2	4	4	20
3	213	21323	2	0	1	80	1	1	2	1	1	1	0	0	18	12	11	93	31	39	0	6	2	3	3	2	4	4	18
3	214	21423	2	0	1	60	4	1	2	1	0	3	0	0	6	12	8	81	39	55	10	1	2	2	3	2	4	4	17
3	215	21523	2	0	1	70	1	1	2	1	0	2	0	0	1	6	4	67	43	56	10	1	5	5	5	5	5	5	30
3	216	21623	2	0	1	79	1	1	2	1	1	1	0	0	3	6	8	77	39	38	10	2	3	3	3	2	4	4	19
3	217	21723	2	0	1	80	1	2	2	1	0	1	1	0	2	6	5	76	33	39	8	3	4	4	3	3	4	4	22
3	218	21823	2	0	1	62	3	1	2	1	0	1	0	0	4	6	5	74	27	44	8	2	3	3	3	1	4	4	18
3	219	21923	2	0	0	76	1	2	2	1	0	1	1	0	8	12	7	78	31	52	5	2	2	3	3	2	4	4	18
3	220	22023	2	0	1	78	2	1	2	1	0	1	0	0	6	6	7	75	35	53	8	3	2	4	3	3	4	4	20
3	221	22123	2	0	1	68	2	1	1	0	1	2	0	0	5	6	7	73	42	56	10	0	4	4	3	3	4	4	22
3	222	22223	2	0	1	78	2	2	1	0	1	1	0	0	6	6	9	79	31	39	10	5	3	3	3	3	4	4	20
3	223	22323	2	0	1	60	2	1	2	1	1	2	0	0	3	6	8	75	42	56	9	2	3	3	3	3	4	4	20
3	224	22423	2	0	0	65	2	1	2	1	0	1	0	0	3	8	8	89	40	56	8	2	3	3	3	3	4	4	20
3	225	22523	2	0	0	77	2	2	2	1	1	2	0	0	3	11	6	76	29	55	9	2	3	4	3	3	4	4	21
3	227	22723	2	0	0	78	1	2	2	1	0	1	1	0	5	9	10	83	31	50	9	2	2	2	3	2	4	4	17
3	228	22823	2	0	0	63	2	1	3	1	1	3	0	0	2	6	4	63	33	56	10	1	3	4	3	3	5	4	22
3	229	22923	2	0	1	71	1	1	2	1	1	1	0	0	3	6	4	72	40	54	8	1	3	4	3	3	5	4	22
3	230	23023	2	0	1	86	2	2	3	1	0	3	0	0	3	15	4	79	28	33	9	5	3	4	4	3	4	4	22
3	231	23123	2	0	0	66	3	1	3	1	1	2	0	0	3	6	6	74	37	56	9	1	4	4	4	4	4	4	24
3	232	23223	2	0	0	77	1	1	2	1	1	3	0	0	4	6	8	104	40	55	10	1	4	4	4	4	4	4	24
3	233	23323	2	0	0	75	1	1	2	1	0	2	0	0	9	6	8	80	31	51	10	2	2	4	3	2	4	4	19
3	234	23423	2	0	1	79	1	1	2	0	1	3	0	0	2	6	8	63	39	56	10	0	3	4	3	3	4	4	21
3	235	23523	2	0	0	79	1	2	2	0	1	2	1	0	4	7	7	73	31	53	10	1	4	4	4	4	4	4	24
3	236	23623	2	0	0	75	2	1	2	1	0	1	0	0	3	6	8	72	41	54	9	1	3	3	4	3	4	4	21
3	237	23723	2	0	1	61	3	1	2	1	0	2	0	0	3	6	5	75	40	56	10	1	4	4	4	4	4	4	24
3	238	23823	2	0	1	60	1	1	2	1	0	2	0	0	2	6	8	79	38	55	7	3	3	3	3	2	4	4	19
3	239	23923	2	0	1	77	2	1	2	1	1	1	0	0	1	6	6	68	37	56	10	0	4	4	3	4	4	4	23
3	240	24023	2	0	1	60	2	1	2	1	1	2	0	0	3	6	5	94	31	56	10	1	3	4	3	3	4	4	21
3	241	24123	2	0	0	67	1	1	3	1	0	2	0	0	19	10	12	106	26	47	5	4	2	3	2	2	3	3	15
3	242	24223	2	0	0	76	1	1	2	1	1	1	0	0	6	6	8	89	34	53	10	4	2	3	2	2	4	4	17
3	243	24323	2	0	0	62	1	1	2	1	1	2	0	0	3	6	6	75	40	56	7	1	4	4	4	4	4	4	24
3	244	24423	2	0	0	63	1	1	2	0	1	2	0	0	2	9	8	73	33	56	7	2	4	4	4	4	4	4	24
1	18	1823	2	0	1	75	1	1	2	1	1	2	0	1	18	17	11	89	28	48	2	3	2	3	3	3	4	4	19
1	22	2223	2	0	1	68	2	1	1	1	1	3	0	1	13	9	10	72	23	56	7	6	3	3	1	3	4	3	17
1	41	4123	2	0	1	60	3	1	2	0	1	3	0	1	17	15	6	79	24	56	7	4	3	3	3	4	4	4	21
1	45	4523	2	0	1	79	3	1	1	0	1	2	0	1	21	21	14	80	18	56	2	8	5	4	3	4	4	4	24
1	47	4723	2	0	1	76	2	2	2	1	0	1	1	1	12	18	11	101	20	53	6	6	2	3	3	3	3	3	17
1	51	5123	2	0	0	65	2	1	2	1	0	3	0	1	16	10	11	111	13	56	7	6	2	2	1	2	3	2	12
1	53	5323	2	0	1	64	2	1	1	1	0	3	0	1	15	7	9	68	20	35	8	10	1	2	1	2	4	3	13
1	54	5423	2	0	0	72	1	1	2	1	1	3	0	1	6	8	11	75	34	53	9	6	4	4	3	2	4	4	21
1	55	5523	2	0	1	72	2	1	2	1	1	3	0	1	8	12	10	89	36	56	9	7	3	4	2	2	3	3	17
1	56	5623	2	0	0	80	2	1	2	0	1	2	0	1	10	9	13	97	23	56	7	2	2	3	1	3	4	3	16
1	58	5823	2	0	1	82	1	1	2	0	1	2	0	1	3	10	11	105	23	44	9	5	2	3	1	2	4	4	16
1	64	6423	2	0	1	81	2	2	2	0	1	2	1	1	7	13	11	88	23	56	9	5	4	4	4	4	4	4	24
1	67	6723	2	0	1	68	3	2	1	1	1	2	1	1	9	18	12	86	23	56	0	4	3	3	3	3	3	3	18
1	79	7923	2	0	0	78	1	2	2	0	1	2	0	1	26	20	10	88	25	48	5	10	2	3	2	2	4	2	15
1	80	8023	2	0	1	74	2	2	1	0	1	2	1	1	6	16	10	92	15	56	0	4	3	3	3	3	3	3	18
2	83	8323	2	0	1	78	1	2	2	1	1	1	1	1	10	10	12	109	21	56	6	10	3	3	2	3	3	3	17
2	112	11223	2	0	0	80	1	2	2	0	1	2	0	1	7	10	10	105	24	53	8	3	4	4	3	3	4	3	21
2	118	11823	2	0	0	73	1	1	1	1	1	2	0	1	20	17	11	68	17	56	1	11	2	4	2	3	2	2	15
2	119	11923	2	0	1	76	1	1	2	1	1	3	1	1	10	15	9	77	28	54	5	6	3	3	2	3	3	3	17
2	149	14923	2	0	1	93	2	2	2	0	1	1	1	1	29	21	14	91	15	37	1	3	3	2	2	1	3	2	13
3	164	16423	2	0	1	78	2	1	2	1	1	1	0	1	13	7	13	77	27	40	10	5	3	3	2	2	4	4	18
3	172	17223	2	0	1	78	1	2	2	1	0	1	0	1	7	12	9	97	32	56	2	2	4	4	3	3	4	4	22
3	173	17323	2	0	0	63	1	2	1	0	1	1	1	1	7	14	9	80	32	55	5	1	4	4	3	4	4	4	23
3	199	19923	2	0	1	81	1	2	2	1	0	1	1	1	10	14	10	92	17	52	0	0	3	3	3	3	4	4	20
3	226	22623	2	0	1	87	2	2	2	1	1	1	1	1	11	10	9	74	28	53	10	4	2	3	2	2	4	4	17
